# Supplementary material for: CleAir Monitoring System for Particulate Matter: A Case in the Napoleonic Museum in Rome
Source: MDPI journal article supplement (doi:10.3390/s17092076), 2017-09-11

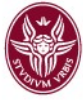

Roma, lì September 8<sup>th</sup>, 2017

To the Editorial Office  
of SENSORS

**Object: submission of the revised proofs of the paper SENSORS-216518**

Dear Editor

Please find enclosed the proofs of the paper SENSORS-216518 that were revised according to the comments of the editorial office. The changes are “built in track”

Here is the description of our changes: [ C= your comment, A= our answer ]

**C1:** Please carefully check the accuracy of names and affiliations. Changes will not be possible after proofreading.

**A1:** Names and affiliations are correct. However the email of E. Fazio has been included in the affiliation 1 .

**C2:** Please ensure intended meaning has been retained.

**A2:** OK. Brackets are included in : (i.e., particulate matter with aerodynamic diameters that are generally 10  $\mu\text{m}$  and smaller)

**C3:** Please add the unit for the value in the figure.

**A3:** no units can be added because optical density (O.D.), optical absorbance and transmission are dimensionless parameters . This has been specified in the caption of the Figure

**C4:** Please add the unit for the value in the figure

**A4:** no units can be added because optical absorbance is a dimensionless parameter. This has been specified in the caption of the Figure

**C5:** Revised, please confirm.

**A5:** they are correct

**C6:** Please ensure intended meaning “Regarding the size”

**A6:** correct

**C7:** Incorrect ref order, 34 detected after 32. Please note that the reference should be cited in numeral order.

**A7:** the following reference (#33) has been cancelled “33. Sharma, N.L.; Kuniyal, J.C.; Singh, M.; Dhyani, P.P.; Mathela, C.S.; Guleria,.....” and the reference order has been updated

**C8:** Please confirm the reference type, the same as [3–8]. If it is an online source, please add the web source.

**A8:** The references have been updated and the order in the text has been also updated

**C9:** Please add publisher: city, country.

**A9:** done

**C10:** Newly added information, please confirm

**A10:** done

**C11:** Please add title and the date month year.

**A11:** done

Please note also that there were some typos which have been corrected as well.

With our best regards

Eugenio Fazio



Supplement: s1 [file s1]
